# Supplementary material
Source: Springer Nature journal article supplement (https://www.springermedizin.de/resource/supplementary/12943_2010_813_MOESM7_ESM.pdf/9554890)

A

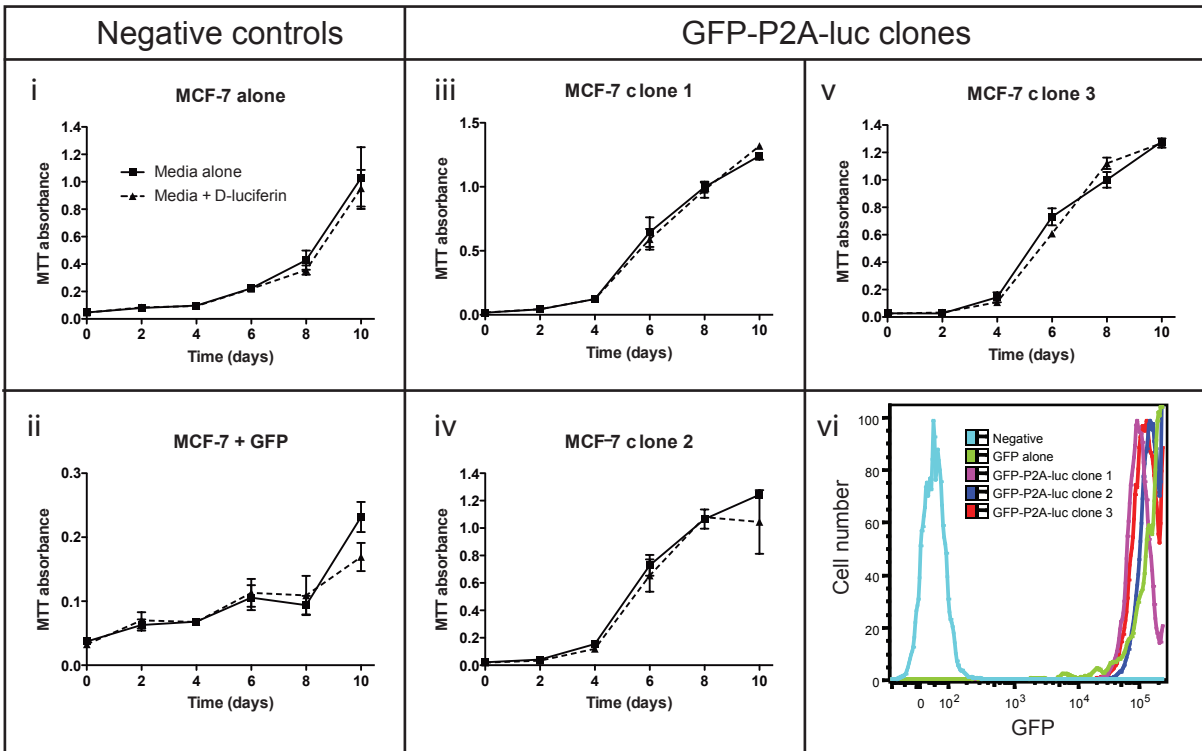

B

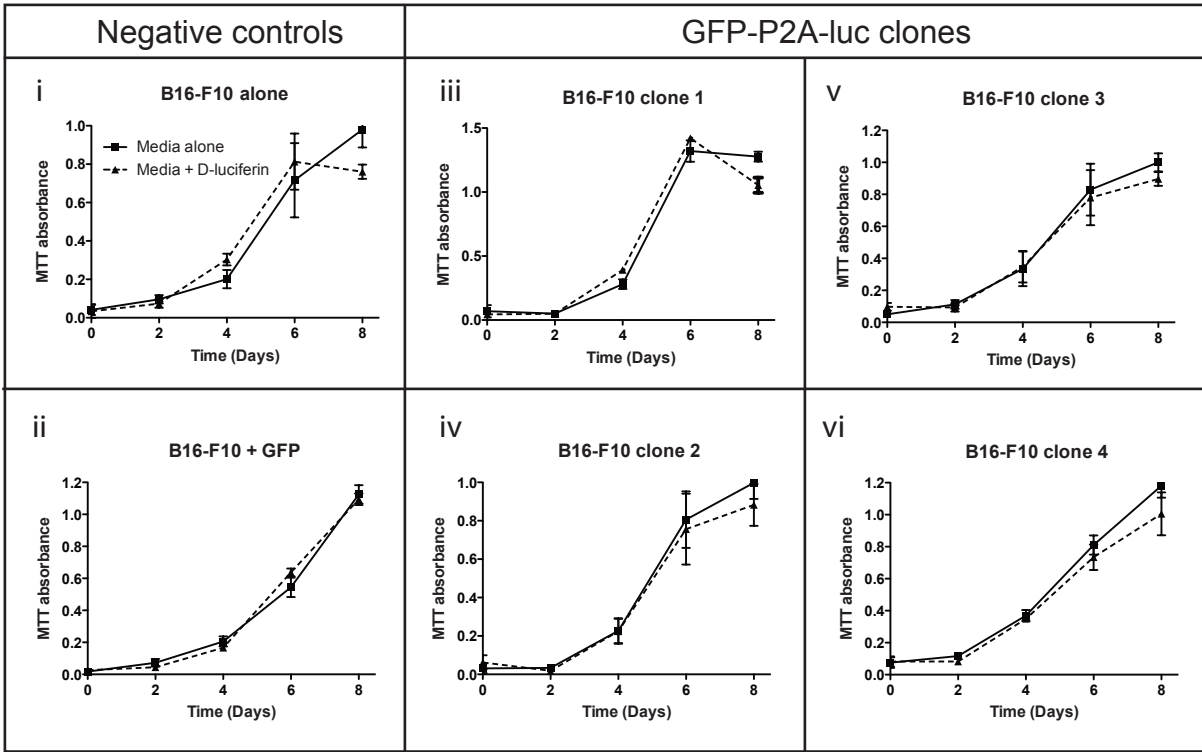

Supplement: MOESM7 [file 9554890]
